# Supplementary material
Source: publisher figshare collection journal article supplement (https://gsajournals.figshare.com/ndownloader/files/12776375)
Supplement: Supplementary file 1 [file 12776375]

Table S3. Phenotype data for the MAGIC population
Line	SeedCoat
IT89KD_288	0
IT84S_2049	0
CB27	1
IT82E_18	0
SuVita_2	0
IT00K_1263	0
IT84S_2246	0
IT93K_503_1	0
MAGIC001	0
MAGIC002	0
MAGIC003	0
MAGIC004	0
MAGIC005	1
MAGIC006	0
MAGIC008	1
MAGIC009	0
MAGIC010	1
MAGIC011	0
MAGIC012	0
MAGIC013	1
MAGIC015	0
MAGIC016	0
MAGIC017	0
MAGIC018	0
MAGIC019	1
MAGIC020	0
MAGIC021	0
MAGIC022	0
MAGIC023	0
MAGIC024	1
MAGIC025	0
MAGIC027	0
MAGIC028	0
MAGIC029	0
MAGIC030	0
MAGIC031	0
MAGIC032	0
MAGIC033	0
MAGIC034	0
MAGIC035	0
MAGIC036	1
MAGIC037	0
MAGIC038	0
MAGIC039	0
MAGIC040	0
MAGIC041	0
MAGIC042	0
MAGIC043	0
MAGIC044	0
MAGIC045	0
MAGIC046	0
MAGIC047	0
MAGIC048	0
MAGIC049	0
MAGIC050	0
MAGIC051	0
MAGIC052	1
MAGIC053	0
MAGIC054	0
MAGIC055	0
MAGIC057	0
MAGIC058	0
MAGIC059	1
MAGIC060	0
MAGIC061	0
MAGIC062	0
MAGIC064	0
MAGIC065	0
MAGIC066	0
MAGIC067	0
MAGIC068	1
MAGIC069	0
MAGIC070	1
MAGIC072	0
MAGIC073	0
MAGIC074	0
MAGIC075	0
MAGIC076	0
MAGIC077	0
MAGIC078	0
MAGIC079	0
MAGIC080	0
MAGIC081	0
MAGIC082	0
MAGIC083	0
MAGIC084	0
MAGIC085	0
MAGIC086	0
MAGIC087	0
MAGIC088	0
MAGIC089	0
MAGIC090	0
MAGIC091	0
MAGIC092	0
MAGIC094	0
MAGIC095	0
MAGIC096	0
MAGIC097	1
MAGIC098	0
MAGIC099	NaN
MAGIC100	0
MAGIC101	0
MAGIC102	0
MAGIC104	0
MAGIC105	0
MAGIC106	0
MAGIC107	0
MAGIC109	0
MAGIC110	0
MAGIC111	0
MAGIC112	1
MAGIC113	0
MAGIC114	1
MAGIC115	0
MAGIC116	0
MAGIC117	1
MAGIC118	1
MAGIC119	0
MAGIC120	0
MAGIC122	1
MAGIC123	0
MAGIC124	NaN
MAGIC125	0
MAGIC126	0
MAGIC127	0
MAGIC128	0
MAGIC129	0
MAGIC130	1
MAGIC131	0
MAGIC132	0
MAGIC133	0
MAGIC134	0
MAGIC135	0
MAGIC136	0
MAGIC138	0
MAGIC139	0
MAGIC140	0
MAGIC141	0
MAGIC143	0
MAGIC144	0
MAGIC146	0
MAGIC147	0
MAGIC148	0
MAGIC149	0
MAGIC150	0
MAGIC151	0
MAGIC152	0
MAGIC153	0
MAGIC154	0
MAGIC155	0
MAGIC157	0
MAGIC158	0
MAGIC160	0
MAGIC162	0
MAGIC163	1
MAGIC166	0
MAGIC167	0
MAGIC168	1
MAGIC169	0
MAGIC170	0
MAGIC171	0
MAGIC172	0
MAGIC173	0
MAGIC174	0
MAGIC175	0
MAGIC176	0
MAGIC177	0
MAGIC178	0
MAGIC179	0
MAGIC180	0
MAGIC181	0
MAGIC182	0
MAGIC183	0
MAGIC184	0
MAGIC185	0
MAGIC187	0
MAGIC188	0
MAGIC189	0
MAGIC190	1
MAGIC191	1
MAGIC192	0
MAGIC193	0
MAGIC194	0
MAGIC195	1
MAGIC196	0
MAGIC197	0
MAGIC198	0
MAGIC199	0
MAGIC200	0
MAGIC201	0
MAGIC202	1
MAGIC203	0
MAGIC204	0
MAGIC205	0
MAGIC206	0
MAGIC207	0
MAGIC208	0
MAGIC209	1
MAGIC210	0
MAGIC211	0
MAGIC212	0
MAGIC214	0
MAGIC216	0
MAGIC217	0
MAGIC219	0
MAGIC220	0
MAGIC222	0
MAGIC223	0
MAGIC224	0
MAGIC225	0
MAGIC226	1
MAGIC227	0
MAGIC228	0
MAGIC229	0
MAGIC230	1
MAGIC231	1
MAGIC232	0
MAGIC233	0
MAGIC234	0
MAGIC236	0
MAGIC237	0
MAGIC238	0
MAGIC240	1
MAGIC241	0
MAGIC242	0
MAGIC243	0
MAGIC244	0
MAGIC245	0
MAGIC246	0
MAGIC247	0
MAGIC248	0
MAGIC249	1
MAGIC250	0
MAGIC251	0
MAGIC254	1
MAGIC255	0
MAGIC256	0
MAGIC257	0
MAGIC258	0
MAGIC259	0
MAGIC260	0
MAGIC262	0
MAGIC263	0
MAGIC264	0
MAGIC265	0
MAGIC266	0
MAGIC267	0
MAGIC268	0
MAGIC269	0
MAGIC270	0
MAGIC271	0
MAGIC272	0
MAGIC273	0
MAGIC274	0
MAGIC275	1
MAGIC276	0
MAGIC277	0
MAGIC278	0
MAGIC279	0
MAGIC280	1
MAGIC281	0
MAGIC282	0
MAGIC283	1
MAGIC284	0
MAGIC285	0
MAGIC286	0
MAGIC287	0
MAGIC288	0
MAGIC289	0
MAGIC290	0
MAGIC291	0
MAGIC292	0
MAGIC293	0
MAGIC294	0
MAGIC295	0
MAGIC296	0
MAGIC297	1
MAGIC298	1
MAGIC300	0
MAGIC301	0
MAGIC302	0
MAGIC303	0
MAGIC304	0
MAGIC305	0
MAGIC307	0
MAGIC311	0
MAGIC312	0
MAGIC313	0
MAGIC314	0
MAGIC315	0
MAGIC317	0
MAGIC320	0
MAGIC321	0
MAGIC322	0
MAGIC323	0
MAGIC324	0
MAGIC325	1
MAGIC326	0
MAGIC327	0
MAGIC328	0
MAGIC329	0
MAGIC330	1
MAGIC331	0
MAGIC333	0
MAGIC335	0
MAGIC336	0
MAGIC337	0
MAGIC338	0
MAGIC339	0
MAGIC340	0
MAGIC343	0
MAGIC361	NaN
MAGIC362	NaN
